# Supplementary material
Source: PubMed Central journal article supplement (PMC8058316)
Supplement: NIHMS1684363-supplement-Supplement.pdf [file NIHMS1684363-supplement-Supplement.pdf]

### **Difference-in-differences Model**

Our analytic approach adopts a generalized difference-in-differences analysis with multiple treatment units, including two-way fixed effects for each individual and year. We estimate the effect of the state-level EITC policy on an outcome of interest  $Y_{ist}$  for individual  $i$  living in state  $s$  in year  $t$ . Let  $D_{st} = StateEITC_s \times Post_t$  represent exposure to the state-level EITC policy after implementation of the policy, equal to zero during the pre-policy period in states that eventually pass EITC policies and for all non-EITC states. Our main estimating equation is:

$$Y_{ist} = \beta_0 + \beta_1 D_{st} + \beta_2 IndividualCov_{ist} + \beta_3 StateCov_{st} + \alpha_i + \theta_t + \varepsilon_{ist}$$

where *IndividualCov* and *StateCov* represent the individual-level and state-level covariates described in the manuscript.  $\alpha_i$  represents indicator variables for each individual (i.e., individual fixed effects), implying that the effect is estimated from within-person variation in exposure to different state EITC benefit levels, which overcomes confounding due to unobserved time-invariant individual characteristics. Similarly,  $\theta_t$  represents indicator variables for years (i.e., year fixed effects), which accounts for all (observed and unobserved) period-specific changes that affect all states, such as changes in national taxation levels or federal welfare policies. Finally,  $\varepsilon_{ist}$  represents robust standard error clustered at the state level, to account for correlated observations in each state. The coefficient of interest  $\beta_1$  represents the effect of state-level EITC policies on the outcome of interest among EITC-eligible individuals. Alternate model specifications include an indicator for each state (i.e., state fixed effects).

**Supplemental Table 1. State EITC Programs**

| State                       | Percent of Federal Credit                                 | Refundable | First Tax Year Implemented | Included in Study |
|-----------------------------|-----------------------------------------------------------|------------|----------------------------|-------------------|
| California                  | 85                                                        | Yes        | 2015                       | Yes               |
| Colorado <sup>a</sup>       | 10                                                        | Yes        | 1999, 2015                 | No                |
| Connecticut                 | 30                                                        | Yes        | 2011                       | Yes               |
| Delaware                    | 20                                                        | No         | 2006                       | Yes               |
| Hawaii                      | 20                                                        | No         | 2017                       | Yes               |
| Illinois                    | 10                                                        | Yes        | 2000                       | Yes               |
| Indiana                     | 9                                                         | Yes        | 1999                       | Yes               |
| Iowa                        | 15                                                        | Yes        | 1990                       | Yes               |
| Kansas                      | 17                                                        | Yes        | 1998                       | Yes               |
| Louisiana                   | 3.5                                                       | Yes        | 2008                       | Yes               |
| Maine                       | 5                                                         | Yes        | 2000                       | Yes               |
| Maryland <sup>b</sup>       | 26                                                        | Yes        | 1987                       | No                |
|                             | 50                                                        | No         |                            |                   |
| Massachusetts               | 23                                                        | Yes        | 1997                       | Yes               |
| Michigan                    | 6                                                         | Yes        | 2008                       | Yes               |
| Minnesota                   | 34 (avg.)                                                 | Yes        | 1994                       | Yes               |
| Montana                     | 3                                                         | Yes        | 2019                       | Yes               |
| Nebraska                    | 10                                                        | Yes        | 2006                       | Yes               |
| New Jersey                  | 35                                                        | Yes        | 2000                       | Yes               |
| New Mexico                  | 10                                                        | Yes        | 2007                       | Yes               |
| New York                    | 30                                                        | Yes        | 1991                       | Yes               |
| North Carolina <sup>c</sup> | 5                                                         | Yes        | 2008-2013                  | No                |
| Ohio                        | 10                                                        | No         | 2013                       | Yes               |
| Oklahoma                    | 5                                                         | No         | 2002                       | Yes               |
| Oregon                      | 8                                                         | Yes        | 1997                       | Yes               |
| Rhode Island                | 15                                                        | Yes        | 2001                       | Yes               |
| South Carolina              | 20.83                                                     | No         | 2018                       | Yes               |
| Vermont                     | 32                                                        | Yes        | 1988                       | Yes               |
| Virginia                    | 20                                                        | No         | 2006                       | Yes               |
| Washington <sup>d</sup>     | 10                                                        | Yes        | Not currently implemented  | Yes               |
| Wisconsin                   | 4 (one child)<br>11 (two children)<br>34 (three children) | Yes        | 1984                       | Yes               |
| District of Columbia        | 40                                                        | Yes        | 2000                       | Yes               |

Note: These data were drawn from Markowitz et al., 2017, and updated with the most recent years of state EITC data. EITC: earned income tax credit.

<sup>a</sup> Colorado's original state EITC program was contingent on state surplus revenue and was therefore not available in 2002-2014; the program became permanently available in 2015.

<sup>b</sup> Maryland offers a 25.5 percent refundable or a 50 percent non-refundable EITC; taxpayers can choose to claim either, but not both.

<sup>c</sup> North Carolina eliminated its EITC program starting in 2014 tax year.

<sup>d</sup> Washington enacted a refundable credit in tax year 2009; due to the budget shortfall, policymakers have not financed the credit.

**Supplemental Table 2. Outcomes available by survey year, Panel Study of Income Dynamics, 1995-2015**

| Outcomes                     | Survey Years Available                   |
|------------------------------|------------------------------------------|
| General health               | 1995-1997 (annual), 1999-2015 (biennial) |
| Psychological distress       | 2001, 2003, 2007-2015 (biennial)         |
| Currently drinks alcohol     | 1999-2015 (biennial)                     |
| Drinks per day               | 1999-2015 (biennial)                     |
| Currently smokes             | 1999-2015 (biennial)                     |
| Number of cigarettes per day | 1999-2015 (biennial)                     |

**Supplemental Table 3. Effect of state-level EITC programs on mental health and health behaviors, sensitivity analyses, Panel Study of Income Dynamics, 1995-2015**

| Outcome                                 | Effect of State EITC Program<br>$\beta$ (95% CI) |                               |
|-----------------------------------------|--------------------------------------------------|-------------------------------|
|                                         | Model 1:<br>EITC Eligible in Pre-Period          | Model 2:<br>State EITC Refund |
| General health excellent/very good/good | 0.047<br>(-0.048, 0.14)                          | 0.0056<br>(-0.050, 0.061)     |
| Psychological distress                  | 1.59<br>(-0.075, 3.26)                           | -0.35<br>(-0.98, 0.29)        |
| Currently drinks alcohol                | 0.084<br>(-0.0057, 0.17)                         | 0.0065<br>(-0.041, 0.054)     |
| 3+ alcoholic drinks per day             | 0.030<br>(-0.059, 0.12)                          | 0.030<br>(-0.013, 0.073)      |
| Currently smokes                        | 0.018<br>(-0.061, 0.096)                         | -0.013<br>(-0.051, 0.025)     |
| Number of cigarettes per day            | 0.089<br>(-1.08, 1.26)                           | -0.23<br>(-1.12, 0.66)        |

Study sample was drawn from the Panel Study of Income Dynamics for survey years 1995-2015. Coefficients represent the effect of living in a state after implementation of state-level EITC. All models adjusted for age, age-squared, head of household marital status, number of children, inflation-adjusted household pre-tax income, and income-squared, state gross domestic product per capita, state unemployment rate, state percent of population with a high school degree or less, and fixed effects for individual and year. Model 1 includes individuals eligible for federal EITC in all years before state EITC policy. Model 2 includes the full study sample and sets state EITC refund amount (inflation-adjusted, rescaled to \$1,000 US dollars) as the primary exposure. Robust standard errors were clustered at the state level. EITC: earned income tax credit.

**Supplemental Table 4. Effects of state-level EITC programs on mental health and health behaviors, using State-level Fixed Effects in the Panel Study of Income Dynamics, 1995-2015**

| Outcome                         | Effect of State EITC Program<br>$\beta$ (95% CI) |                            |                            |                           |                            |                          |                            |                             |
|---------------------------------|--------------------------------------------------|----------------------------|----------------------------|---------------------------|----------------------------|--------------------------|----------------------------|-----------------------------|
|                                 | Full Sample                                      | Marital Status             |                            | Gender                    |                            | Race                     |                            |                             |
|                                 | Model 1                                          | Model 2:<br>Single         | Model 3:<br>Married        | Model 4<br>Male           | Model 5<br>Female          | Model 6<br>White         | Model 7<br>Black           | Model 8<br>Hispanic/Other   |
| Excellent/very good/good health | 0.0024<br>(-0.019, 0.024)                        | 0.0088<br>(-0.026, 0.044)  | -0.0015<br>(-0.033, 0.030) | 0.033*<br>(0.0050, 0.061) | -0.016<br>(-0.044, 0.012)  | 0.016<br>(-0.018, 0.050) | -0.022<br>(-0.052, 0.0084) | 0.016<br>(-0.14, 0.17)      |
| Psychological distress          | 0.077<br>(-0.15, 0.31)                           | 0.030<br>(-0.26, 0.32)     | 0.24<br>(-0.25, 0.72)      | 0.015<br>(-0.64, 0.67)    | 0.15<br>(-0.33, 0.63)      | -0.027<br>(-0.42, 0.37)  | 0.14<br>(-0.25, 0.53)      | -0.18<br>(-2.74, 2.39)      |
| Currently drink alcohol         | -0.0016<br>(-0.043, 0.040)                       | -0.039<br>(-0.098, 0.019)  | 0.041<br>(-0.028, 0.11)    | 0.014<br>(-0.030, 0.057)  | -0.0071<br>(-0.058, 0.044) | 0.036<br>(-0.023, 0.095) | -0.029<br>(-0.078, 0.020)  | -0.016<br>(-0.14, 0.10)     |
| 3+ alcoholic drinks per day     | 0.0079<br>(-0.020, 0.036)                        | 0.0055<br>(-0.039, 0.050)  | 0.015<br>(-0.033, 0.062)   | -0.023<br>(-0.069, 0.023) | 0.028*<br>(0.0030, 0.052)  | 0.033<br>(-0.019, 0.086) | 0.0047<br>(-0.029, 0.039)  | -0.092*<br>(-0.18, -0.0070) |
| Currently smoke                 | -0.0059<br>(-0.046, 0.034)                       | -0.0069<br>(-0.071, 0.057) | 0.0014<br>(-0.031, 0.034)  | 0.0072<br>(-0.031, 0.046) | -0.014<br>(-0.074, 0.046)  | 0.022<br>(-0.030, 0.074) | -0.020<br>(-0.076, 0.036)  | 0.13*<br>(0.0072, 0.26)     |
| Number of cigarettes per day    | -0.58<br>(-1.31, 0.14)                           | -0.27<br>(-1.15, 0.60)     | -0.75<br>(-1.83, 0.33)     | -0.40<br>(-1.66, 0.86)    | -0.74<br>(-1.58, 0.10)     | -0.13<br>(-1.13, 0.87)   | -0.74<br>(-1.58, 0.094)    | 1.22<br>(-0.54, 2.99)       |

\*  $p < 0.05$ 

Study sample was drawn from the Panel Study of Income Dynamics for survey years 1995-2015. Coefficients represent the effect of living in a state after implementation of state-level EITC. All models adjusted for gender, age, age-squared, education, head of household race and marital status, number of children, pre-tax inflation-adjusted household earned income, income-squared, state gross domestic product per capita, state unemployment rate, state percent of population with a high school degree or less, and fixed effects for state and year. Robust standard errors were clustered at the state level. EITC: earned income tax credit.

**Supplemental Figure 1. Earned Income Tax Credit, 2018**

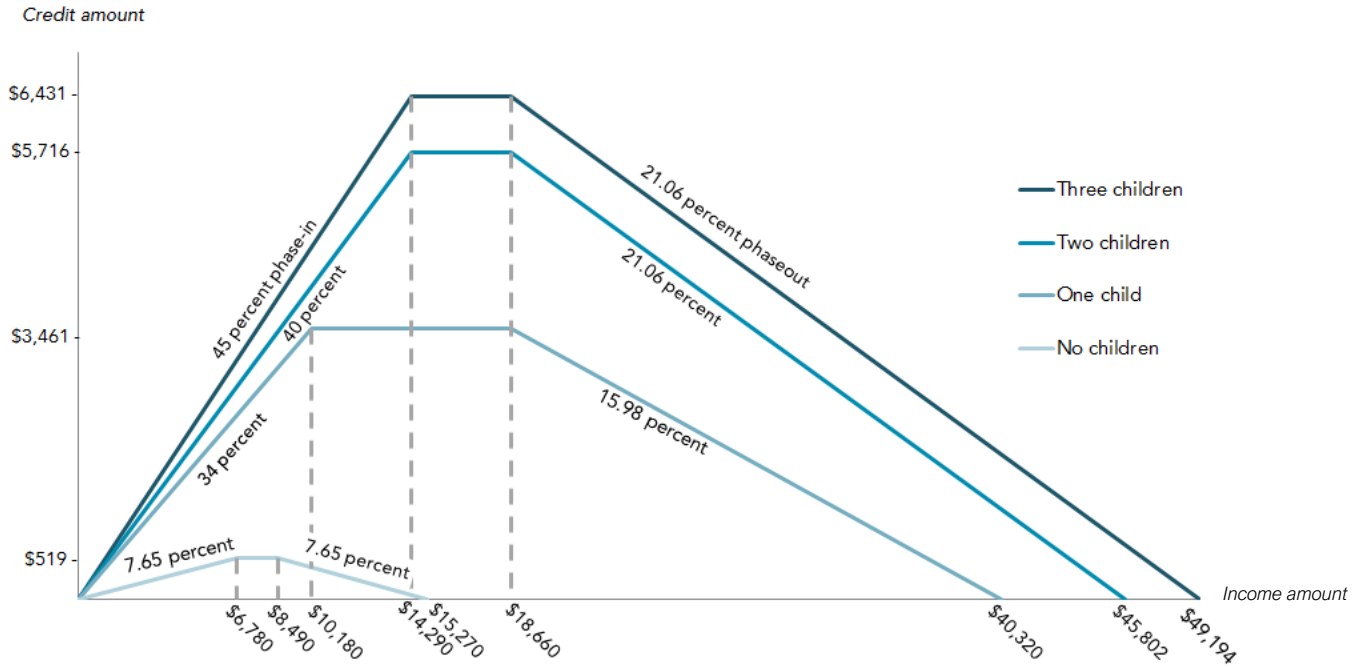

Note: Assumes all income comes from earnings. Amounts are for taxpayers filing a single or head-of-household tax-return. For married couples filing a joint tax return, the credit begins to phase out at income \$5,690 higher than shown.

Source: Urban-Brookings Tax Policy Center (2018).

**Supplemental Figure 2. Event study estimates relative to state EITC implementation, by outcome**

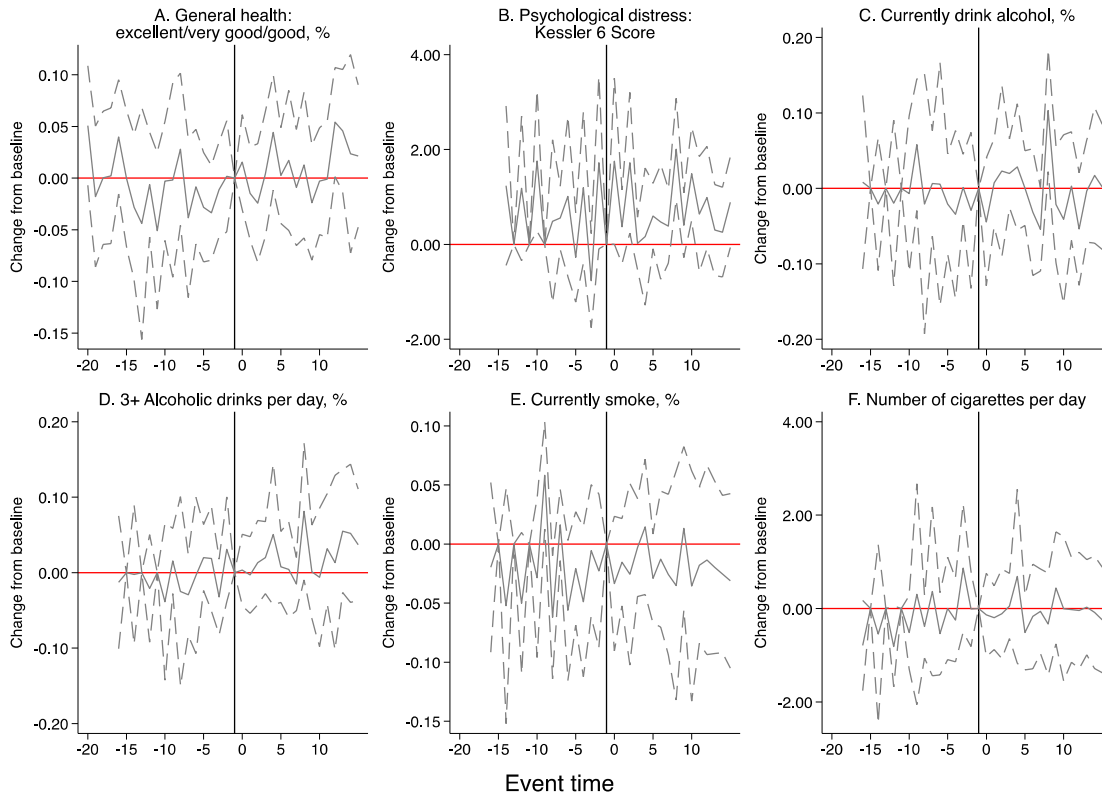

Note: Point estimates (solid lines) are displayed along with their 95% confidence intervals (dashed lines). The baseline (omitted) period is 1 year prior to state EITC implementation. Point estimates represent the difference between EITC and non-EITC states, compared to the prevailing difference, anchored at zero, in the omitted baseline period.
